# 1 **Assessment of Knowledge on Human Monkeypox Virus among General** 2 **Population in Bangladesh: A Nationwide Cross-sectional Study**

3 Sudipta Deb Nath<sup>1¶</sup>, A.M.Khairul Islam<sup>2¶</sup>, Koushik Majumder<sup>3&</sup>,  
4 Fahmida Hoque Rimti<sup>3&</sup>, Jyoti Das<sup>4</sup>, Mustari Nailah Tabassum<sup>3</sup>, Arefin Naher Oishee<sup>5</sup>,  
5 Tarannum Mahmood<sup>3</sup>, Monisha Paul<sup>6</sup>, Muntasrina Akhter<sup>7</sup>, Alok Bijoy Bhadra<sup>8</sup>, Fariha  
6 Hoque Rimu<sup>9</sup>, Snahasish Chakraborty<sup>10</sup>, Preetom Shom<sup>11</sup>, Sirajum Monira Nosaibah<sup>12</sup>, Md  
7 Ashikur Rahman<sup>4</sup>, Ahmed Safwan Khan<sup>13</sup>, Anika Anjum<sup>5</sup>, Sushmita Khan<sup>14</sup>, M. Mahbub  
8 Hossain<sup>15</sup>, Mohammad Delwer Hossain Hawlader<sup>4</sup>.

- 9  
10 1. Department of Genetic Engineering and Biotechnology, University of Dhaka, Dhaka,  
11 Bangladesh  
12 2. International Centre for Diarrhoeal Disease Research, Bangladesh (ICDDR,b), Dhaka,  
13 Bangladesh  
14 3. Chittagong Medical College, Chattogram, Bangladesh  
15 4. Department of Public Health, North South University, Dhaka, Bangladesh  
16 5. M Abdur Rahim Medical College, Dinajpur, Bangladesh  
17 6. Khulna Medical College, Khulna, Bangladesh  
18 7. Public Health Professional Development Society (PPDS), Dhaka, Bangladesh  
19 8. Sheikh Hasina Medical College, Habiganj, Bangladesh  
20 9. University of Rochester Medical Center, New York, USA  
21 10. Rangamati Medical College, Bangladesh  
22 11. Hajee Mohammad Danesh Science & Technology University, Dinajpur, Bangladesh  
23 12. Sylhet MAG Osmani Medical College, Sylhet, Bangladesh  
24 13. Sher -E- Bangla Medical College, Bangladesh  
25 14. Rajshahi Medical College, Rajshahi, Bangladesh  
26 15. Department of Decision and Information Sciences, C.T. Bauer College of Business &  
27 Department of Health Systems and Population Health Sciences, Tilman J. Fertitta Family  
28 College of Medicine, University of Houston, TX, USA

29  
30 Corresponding Author: A.M.Khairul Islam

31 Email: [ikhairul963@gmail.com](mailto:ikhairul963@gmail.com)

NOTE: This preprint reports new research that has not been certified by peer review and should not be used to guide clinical practice.

32 ¶ Sudipta Deb Nath and A.M.Khairul Islam are joint first authors

33 & Koushik Majumder and Fahmida Hoque Rimti are joint second authors

34

35

36

37

38

39

40

41

42

43

44

45

46

47

48

49

50

## 51 **Abstract**

52 **Introduction:** Monkeypox is a zoonotic Orthopox virus of the Poxviridae family. The  
53 general public should be well-informed about monkeypox to prevent the disease in the  
54 community effectively.

55 **Objective:** The study aimed to determine the public awareness level about monkeypox  
56 among the general community to provide information regarding future measures.

57 **Materials and Method:** The study's design was a cross-sectional observational  
58 study. From May to June 2022, a nationwide survey was conducted from Bangladesh's eight  
59 administrative divisions. Data were collected from participants through a semi-structured  
60 questionnaire, and using Cochran's formula determined the sample size. Data were collected  
61 via face-to-face interviews and analyzed using IBM SPSS v.25.

62 **Result:** Among the total of 1,711 respondents to the questionnaire, about 66.6% of the  
63 respondents (N=1139) were aware of monkeypox. Among those that were aware of  
64 monkeypox, almost two-thirds of the (66.6%) respondents had insufficient knowledge about  
65 the transmission pathways ( $0.71 \pm 0.73$ ), vaccination ( $0.09 \pm 0.27$ ), and the signs and  
66 symptoms of monkeypox ( $1.91 \pm 1.50$ ). The majority of participants were unable to select the  
67 treatment of monkeypox ( $0.22 \pm 0.59$ ). The factors affecting the knowledge level of  
68 monkeypox were educational status and occupation ( $p < 0.001$ ).

69 **Conclusion:** The general community has a minimal understanding of the spread of  
70 monkeypox and its prevention. This virus requires additional research on its epidemiology,  
71 ecology, and biology in endemic regions to be comprehended and prevented.

72

73

74

75

76

77

78

79

## 80 **1. Introduction**

81 A newly concerning name, monkeypox is a zoonotic disease caused by infection with the  
82 monkeypox virus, a member of the Orthopoxvirus genus (1,2). The virus was first detected in  
83 1958 in the Cynomolgus monkey colony (1). Afterward, in 1971, the first monkeypox case  
84 was identified in the Democratic Republic of Congo [DRC], and following this, the disease  
85 became endemic in central and West Africa (2–4). However, the first incidence outside  
86 Africa occurred in the United States in 2003, caused by a rodent imported from Ghana (1–3).  
87 The detection of cases in the UK and Israel in 2018 and in Singapore in 2019 was  
88 documented accordingly (5,6). Since May of 2022, more than sixteen thousand cases and five  
89 fatalities have been reported in seventy-five nations, prompting the World Health  
90 Organization (WHO) to declare this a public health emergency of international significance  
91 (7). This new emergence is sporadic compared to its other presentations such as younger  
92 patients, higher prevalence in men, higher rates of sexual transmission, anogenital lesions, an  
93 incubation period of up to 21 days, infection without traveling to an endemic area, etc. (8–  
94 10).

95 This disease presents similar to smallpox, such as fever accompanied by headache, rash, back  
96 pain, malaise, and fatigue, except for the specific symptom of lymphadenopathy (1,2).  
97 Moreover, the vesiculopustular rash with all macular, papular, vesicular, and pustular stages  
98 makes the disease different from other vesiculopustular rash-like diseases (1,2).

99 The virus is transmitted through bushmeat handling, animal hosts, such as squirrels, rodents,  
100 and prairie dogs, infected oropharyngeal secretion, and direct contact (1,2,11). Several risk  
101 factors, such as the interaction between humans and infected animals, termination of  
102 smallpox vaccination, and increased globalization, make the disease a future global public  
103 health concern (1,12). In a cohort study in the Democratic Republic of Congo (DRC),  
104 smallpox-vaccinated people showed 85% capacity to prevent the infection (3,13).  
105 Consequently, the rising occurrence among the younger unprotected population raises  
106 concerns about the imminent spread of the human monkeypox virus (13). Although the case  
107 fatality rate of monkeypox is less, it may result in some critical complications (12,14).

108 Although the reason for re-emergence is still unknown, its broad range of animal hosts with  
109 high adaptation power is already making the virus alarming for the future (15). A report by  
110 the World Health Organization (WHO) revealed that a lack of information about the

111 monkeypox was one of the obstacles in preventing its re-emergence (16). Studies done on  
112 general practitioners revealed that only 10%(Indonesia), 18.6%(Saudi Arabia), and 27%(  
113 Italy) of the participants had sufficient knowledge about monkeypox (17–20). Another study  
114 in Saudi Arabia showed that 48% of the general population had sufficient knowledge about  
115 monkeypox (21). To limit the chance of the monkeypox virus spreading across the nation, the  
116 general public must be educated about the disease and know how to protect themselves. This  
117 study aims to measure the level of knowledge about monkeypox among the general  
118 population of Bangladesh to provide baseline information and comprehension of the  
119 necessary subsequent steps.

## 120 **2. Methodology**

### 121 **2.1. Study design, settings, and ethics**

122 This was an observational type of cross-sectional study and comprised participants from all  
123 the eight divisions (Barishal, Chattogram, Dhaka, Khulna, Mymensingh, Rajshahi, Rangpur,  
124 and Sylhet) of Bangladesh, marking it as a nationwide representative sample. The survey was  
125 conducted from May to June 2022, immediately after the confirmation of the ongoing  
126 outbreak of the human monkeypox virus this year. We followed the multi-stage sampling  
127 method to collect our data. Informed consent was taken from every participant. The  
128 anonymity and confidentiality were ensured by skipping the participant's name. Ethical  
129 clearance for the study was taken from the Institutional Review Board (IRB) of North South  
130 University (2022/0R-NSU/IRB/0501).

### 131 **2.2. Criteria of inclusion and exclusion**

132 The criteria of inclusion for participants were 1) being a Bangladeshi resident, 2) being an  
133 adult ( $\geq 18$  years old), and 3) providing consent. The exclusion criteria included- 1) being  
134 under 18 years old, 2) having any psychiatric illnesses and 3) incomplete surveys.

### 135 **2.3. Sample size calculation**

136 We determined our sample size using Cochran's formula (22). The formula is as below:

$$137 \quad Ss = \frac{(z^2 \times \frac{p(1-p)}{e^2})}{(1 + z^2 \times \frac{p(1-p)}{e^2 N})} = 383$$

138 Where, N = Population Size, P = % picking a choice (0.05), e = margin of error (5%), z = z-  
139 score (95%- 1.96), Ss = Sample size

140 The calculated sample size is 384 for each of the eight divisions in Bangladesh. So, the total  
141 calculated sample size is 3,064. Within the short period and with limited logistic resources,  
142 we collected 1,711 data for this study.

## 143 **2.4. Development and validation of the survey questionnaire**

144 A 20-item semi-structured questionnaire was first developed following Center for Disease  
145 Control and Prevention (CDC) guidelines and a study by Harapan H. *et al.* (16,17,23). Then,  
146 we ran a pilot study on 85 participants to check the validation of the questionnaire among the  
147 general population. Finally, the questionnaire was revised, upgraded, and divided into two  
148 sections to collect data. The first section consisted of socio-demographic variables, such as  
149 gender, age, education, and profession. The second section consisted of 12 questions  
150 regarding knowledge of the monkeypox outbreak, its signs, symptoms, prevention, and  
151 treatment. Moreover, we translated the questionnaire into Bengali for easy understanding.

## 152 **2.5. Data Collection**

153 All of the data was collected via face-to-face interviews. Ten data collectors collected data  
154 after one week of training regarding the data collection tools and measures for ensuring  
155 optimal participation. It took approximately 10 and 12 minutes to complete the questionnaire.  
156 The study's objective was described to all the participants in their native language (Bengali).

## 157 **2.6. Study variables**

158 For the questions regarding knowledge of monkeypox, participants were given 1 for each  
159 correct answer and 0 for each incorrect one. For the questions with more than one correct  
160 answer, each correct option was given 1 point. The mean score per question is demonstrated  
161 in Table 3, and the mean score difference concerning socio-demographic variable are in  
162 Table 4.

## 163 2.7. Statistical analysis

164 All the data analysis was done using IBM SPSS v.25. The illustration was prepared by  
165 Microsoft Power BI May 2022 Update (2.105.664.0). Descriptive analysis of the socio-  
166 demographic variables is shown in Table 1. Simple and multiple binary logistic regression  
167 was used to see the effects of demographic variables on being aware of monkeypox. Omnibus  
168 Tests of Model Coefficients and Hosmer and Lemeshow Goodness of Fit Test were  
169 performed to see the validity of the regression model. Results were presented as crude and  
170 adjusted odds ratios. Independent-Samples T-test and One-way ANOVA test were conducted  
171 to observe the mean score difference among the categories of the socio-demographic  
172 information. P values less than 0.05 were considered significant.

## 173 3. Results

### 174 3.1. Sociodemographic Information

175 In total, 1711 respondents completed the questionnaire. Men (N=979; 57.2%) made up the  
176 most of the cohort. More than one-third of the respondents (N=1102; 64.4 %) were between  
177 18 and 35, and more than one-third indicated a graduate degree as their highest educational  
178 attainment (N=664; 38.8 %). Three-fourths of the participants reported living in an urban area  
179 (N=1284; 75.0%), as shown in Table 1.

180 **Table 1:** Socio-demographic information of the participants

| Socio-demographic information | Category | Number (%)   |
|-------------------------------|----------|--------------|
| Age (in years) (N = 1711)     | 18-35    | 1102 (64.4%) |
|                               | 36-50    | 349 (20.4%)  |
|                               | Above 50 | 260 (15.2%)  |
| Gender (N = 1711)             | Male     | 979 (57.2%)  |
|                               | Female   | 732 (42.8%)  |

|                               |                      |              |
|-------------------------------|----------------------|--------------|
| Educational Status (N = 1711) | No formal education  | 142 (8.3%)   |
|                               | Primary              | 107 (6.3%)   |
|                               | Secondary            | 199 (11.6%)  |
|                               | Higher secondary     | 346 (20.2%)  |
|                               | Graduate             | 664 (38.8%)  |
|                               | Postgraduate         | 253 (14.8%)  |
| Occupation (N = 1711)         | Unemployed/retired   | 97 (5.7%)    |
|                               | Student              | 593 (34.7%)  |
|                               | Homemaker            | 197 (11.5%)  |
|                               | Daily worker         | 187 (10.9%)  |
|                               | Service holder       | 307 (17.9%)  |
|                               | Business             | 212 (12.4%)  |
|                               | Health professionals | 118 (6.9%)   |
| Residence (N = 1711)          | Rural                | 427 (25.0%)  |
|                               | Urban                | 1284 (75.0%) |

181

### 182 **3.2. Awareness about the Monkeypox and the sources**

183 About 66.6% of the respondents (N=1139) were aware of monkeypox while 38.3% (N=657)  
 184 were unaware of such virus. The respondents who were aware of monkeypox also reported  
 185 the source from which they obtained Human Monkeypox virus-related information. Most of  
 186 the participants acquired their information from social media (N = 825; 48.2%) and the  
 187 internet (N= 575; 33.6%). On the contrary, healthcare personnel (N=118; 1.5%) were the  
 188 least influential (Figure 1).



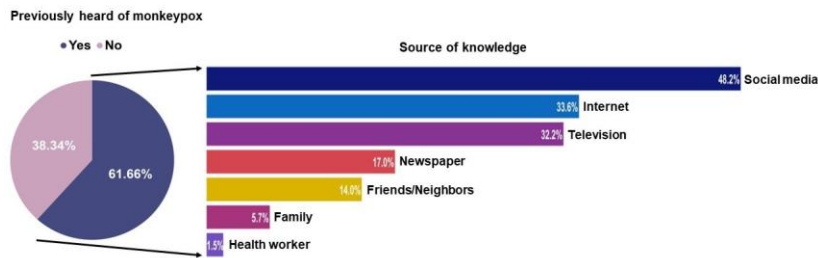

189

190 **Figure 1:** Awareness of the respondents about monkeypox and their source of knowledge.  
 191 Pie chart shows if respondents were previously aware about monkeypox or not. Bar chart  
 192 shows respondents' source of knowledge about monkeypox.

### 193 3.3. Respondents' awareness about monkeypox

194 Gender, occupation, and place of residence had statistically significant effects on respondents'  
 195 awareness of monkeypox. (Table 2) Male respondents were almost 1.5 times more likely than  
 196 female respondents to have heard of monkeypox. (AOR: 1.4, 95% CI [1-1.8], p<0.001).  
 197 (Table 2) Respondents having secondary level (AOR: 4, 95% CI [2.1- 7.4], p<0.001), higher  
 198 secondary level (AOR: 8.1, 95% CI [4.2-15.4], p<0.001), graduate level (AOR: 11.2, 95% CI  
 199 [5.9-21.4], p<0.001) and post-graduate level (AOR: 9.8, 95% CI [5.0-19.2], p<0.001)  
 200 education was significantly associated with awareness and the odds of respondents being  
 201 aware of this virus increased with their higher education level. Respondents from urban areas  
 202 were more likely to be aware of monkeypox (AOR: 1.4, 95% CI [1.7-2.3], p<0.001). (Table  
 203 2)

204

205 **Table 2:** Factors affecting the awareness of the respondents' about monkeypox

| Variables | Crude odds ratio (COR) | Range of COR (95% CI) | P-value | Adjusted odds ratio (AOR) | Range of AOR (95% CI) | P-value |
|-----------|------------------------|-----------------------|---------|---------------------------|-----------------------|---------|
|           |                        |                       |         |                           |                       |         |

|                           |      |           |         |      |          |         |
|---------------------------|------|-----------|---------|------|----------|---------|
| Age (in years)            |      |           |         |      |          |         |
| 18-35                     | 2.7  | 2.0-3.5   | <0.001* | 1.3  | 0.9-1.9  | 0.118   |
| 36-50                     | 1.2  | 0.9-1.7   | 0.193   | 1.3  | 0.9-1.9  | 0.207   |
| Above 50 (Ref)            | 0.0  | 0.0       |         | 0.0  | 0.0      |         |
| Gender                    |      |           |         |      |          |         |
| Male                      | 1.0  | 0.8-1.2   | 0.972   | 1.4  | 1-1.8    | 0.021*  |
| Female (Ref)              | 0.0  | 0.0       |         | 0.0  | 0.0      |         |
| Educational Status        |      |           |         |      |          |         |
| No formal education (Ref) |      | 0.0       |         | 0.0  | 0.0      |         |
| Primary                   | 3.0  | 1.6-5.8   | 0.001*  | 2.6  | 1.3-5.1  | 0.005*  |
| Secondary                 | 5.7  | 3.2-10.1  | <0.001* | 4.0  | 2.1-7.4  | <0.001* |
| Higher secondary          | 15.4 | 8.8-26.7  | <0.001* | 8.1  | 4.2-15.4 | <0.001* |
| Graduate                  | 23.4 | 13.7-40.0 | <0.001* | 11.2 | 5.9-21.4 | <0.001* |
| Post-graduate             | 18.5 | 10.4-32.9 | <0.001* | 9.8  | 5.0-19.2 | <0.001* |
| Occupation                |      |           |         |      |          |         |
| Unemployed/retired (Ref)  | 0.0  | 0.0       |         | 0.0  | 0.0      |         |
| Student                   | 2.1  | 1.3-3.2   | 0.002*  | 1.2  | 0.7-2    | 0.533   |
| Homemaker                 | 0.7  | 0.4-1.1   | 0.090   | 0.9  | 0.5-1.7  | 0.772   |

|                      |     |         |         |     |         |         |
|----------------------|-----|---------|---------|-----|---------|---------|
| Daily worker         | 0.2 | 0.1-0.3 | <0.001* | 0.6 | 0.3-1.1 | 0.094   |
| Service holder       | 1.6 | 1.0-2.6 | 0.040*  | 1.1 | 0.6-1.8 | 0.829   |
| Business             | 0.8 | 0.5-1.3 | 0.371   | 0.9 | 0.5-1.6 | 0.852   |
| Health professionals | 2.5 | 1.3-4.5 | 0.003*  | 1.4 | 0.7-2.6 | 0.337   |
| Residence            |     |         |         |     |         |         |
| Rural (Ref)          | 0.0 | 0.0     |         | 0.0 | 0.0     |         |
| Urban                | 2.8 | 2.2-3.5 | <0.001* | 1.7 | 1.4-2.3 | <0.001* |

206 \*P-value significant; CI: Confidence Interval.

### 207 **3.4 Knowledge about monkeypox**

208 A 12-item questionnaire was used to assess knowledge about monkeypox among those who  
 209 were aware of the virus. The distribution of each knowledge item about monkeypox and the  
 210 mean scores against each questions are presented in Table 3

211 **Table 3:** Respondents' knowledge score assesment of monkeypox by individual questions

| Knowledge assessment                                                           | Scoring (mean ± sd) |
|--------------------------------------------------------------------------------|---------------------|
| 1. Knowledge of monkeypox prevalence in Africa                                 | 0.66 ± 0.47         |
| 2. Knowledge regarding the outbreak of human monkeypox in Europe, the USA, UK. | 0.61 ± 0.49         |
| 3. Knowledge of Human monkey pox cases in Bangladesh.                          | 0.57 ± 0.50         |
| 4. Knowledge of Monkey pox as a viral disease.                                 | 0.68 ± 0.47         |
| 5. Knowledge regarding causes of monkeypox (squirrels, rat/mice, monkey)       | 0.71 ± 0.73         |
| 6. Knowledge of signs and symptoms of monkeypox.                               | 1.91 ± 1.50         |

|                                                                                      |             |
|--------------------------------------------------------------------------------------|-------------|
| 7. Knowledge of similar signs and symptoms of monkeypox and smallpox.                | 0.48 ± 0.50 |
| 8. Knowledge on the transmission of monkey pox.                                      | 0.86 ± 1.12 |
| 9. Knowledge on international travellers as a source of imported cases of monkeypox. | 0.81 ± 0.39 |
| 10. Knowledge of prevention of monkey pox virus infection.                           | 2.00 ± 1.53 |
| 11. Knowledge on vaccination against the monkey pox virus.                           | 0.09 ± 0.27 |
| 12. Knowledge regarding the treatment of monkey pox virus infection.                 | 0.22 ± 0.59 |

212 In response to the question about the prevalent region of monkeypox, the majority of the  
 213 respondents answered correctly ( $0.66 \pm 0.47$ ), identifying Africa as the most prevalent region  
 214 for monkeypox. Most participants ( $0.61 \pm 0.49$ ) correctly identified the outbreak region for  
 215 monkeypox in Europe, the USA, and the UK. In regards to any cases of monkeypox in  
 216 Bangladesh, respondents' knowledge about this item was insufficient ( $0.57 \pm 0.50$ ). The  
 217 scoring for this item was ( $0.68 \pm 0.47$ ), indicating that the most of the respondents correctly  
 218 identified monkeypox as a viral disease. In response to the question about the source of  
 219 monkeypox, participants were able to choose one or more options from squirrels, rat/mice,  
 220 and monkeys. As all of these animals may be responsible for causing monkeypox, the mean  
 221 scoring of this item ( $0.71 \pm 0.73$ ) indicates that respondents are largely unaware of the  
 222 sources of monkeypox (Table 3).

223 When asked about the signs and symptoms of monkeypox, participants could select one or  
 224 more of the following: fever and headache, rash, muscle discomfort, swollen lymph node,  
 225 and skin lesion. As all of these are signs and symptoms of monkeypox, the mean scoring of  
 226 this item ( $1.91 \pm 1.50$ ) indicates that respondents are largely unaware of the signs and  
 227 symptoms of monkeypox (Table 3). Most of the participants were unable to correctly identify  
 228 that monkeypox and smallpox do indeed have similar symptoms ( $0.48 \pm 0.50$ ). When asked  
 229 how monkeypox was transmitted, participants could select one or more alternatives from an  
 230 animal bite or scratch, wild animal meat preparation/processing, significant respiratory,  
 231 indirect contact with lesion material, and mother to fetus. As all of these are transmission  
 232 pathways of monkeypox, the mean scoring of this item ( $0.86 \pm 1.12$ ) indicates that

233 respondents' knowledge level about the transmission pathways is largely insufficient. The  
234 scoring for this item was  $(0.81 \pm 0.39)$ , indicating that most of the respondents were aware  
235 that international travelers are a source of imported cases of monkeypox (Table 3).

236 In regards to how they would prevent monkeypox, participants were given the option of  
237 avoiding contact with sick animals that could harbor the virus, isolating infected people from  
238 others, avoiding direct contact with infected materials, or practicing good hand hygiene after  
239 contact with infected animals or humans. As all of these are prevention methods of  
240 monkeypox, the mean scoring of this item  $(2.00 \pm 1.53)$  indicates that respondents'  
241 knowledge level about the transmission pathways is insufficient. The scoring for this item  
242 was  $(0.09 \pm 0.27)$ , indicating that most respondents were unaware of a vaccine. Most of the  
243 participants were unable to correctly identify the treatments for monkeypox  $(0.22 \pm 0.59)$   
244 (Table 3).

### 245 **3.5. Factors that influence knowledge scores**

246 In Table 4, the factors affecting the knowledge score were demonstrated. According to the  
247 findings, individuals with a higher degree of education have considerably higher mean  
248 knowledge scores about monkeypox, and the higher the education level, the higher the  
249 knowledge level was. Table-4

250 **Table 4:** Factors affecting participants' knowledge score regarding monkeypox.

| <b>Variables</b>      | <b>Mean <math>\pm</math> sd</b> | <b>P-value</b> |
|-----------------------|---------------------------------|----------------|
| <b>Age (in years)</b> |                                 |                |
| 18-35                 | $9.68 \pm 5.12$                 | 0.676          |
| 36-50                 | $9.53 \pm 5.32$                 |                |
| Above 50              | $9.24 \pm 5.23$                 |                |

| <b>Gender</b>             |              |         |
|---------------------------|--------------|---------|
| Male                      | 9.51 ± 5.24  | 0.485   |
| Female                    | 9.73 ± 5.07  |         |
| <b>Educational Status</b> |              |         |
| No formal education       | 4.35 ± 4.72  | <0.001* |
| Primary                   | 6.65 ± 4.54  |         |
| Secondary                 | 7.51 ± 5.14  |         |
| Higher secondary          | 9.29 ± 5.19  |         |
| Graduate                  | 10.09 ± 5.04 |         |
| Post-graduate             | 10.67 ± 4.89 |         |
| <b>Occupation</b>         |              |         |
| Unemployed/retired        | 9.61 ± 5.05  | <0.001* |
| Student                   | 9.24 ± 5.10  |         |

|                      |              |       |
|----------------------|--------------|-------|
| Homemaker            | 7.60 ± 4.52  |       |
| Daily worker         | 6.46 ± 4.95  |       |
| Service holder       | 10.80 ± 4.78 |       |
| Business             | 8.50 ± 5.17  |       |
| Health professionals | 13.38 ± 4.43 |       |
| <b>Residence</b>     |              |       |
| Rural                | 9.46 ± 5.42  | 0.683 |
| Urban                | 9.63 ± 5.11  |       |

251 \*P-value significant.

252 Respondents with a primary level of education had a higher mean knowledge score (6.65  
 253 ±4.54) than those without formal education (4.35 ±4.72). Compared to those with no formal  
 254 education (4.35 ±4.72), those with a primary level of education had a higher mean knowledge  
 255 score (6.65 ±4.54). The mean knowledge score of respondents with a higher secondary  
 256 degree (9.29 ± 5.19) was greater than that of respondents with a secondary degree (7.51 ±  
 257 5.14) (Table 4). A higher mean knowledge score (10.67 ± 4.89) was also obtained by  
 258 respondents with post-graduate degrees compared to those with graduate degrees (10.09 ±  
 259 5.04). Education and occupational factors significantly influenced the respondents' mean  
 260 knowledge score (p<0.001). Among all of the occupations, healthcare professionals had the  
 261 highest mean knowledge score (13.38 ± 4.43).

## 262 4. Discussion

263 The preliminary results of the study indicated that the general public lacked essential  
264 awareness and understanding of monkeypox. About 66.6% of the respondents were aware of  
265 monkeypox, while 38.3% were unaware of such virus and had never heard of monkeypox  
266 before completing the survey. Since monkeypox is a re-emerging infectious disease and no  
267 cases have ever been documented in Bangladesh or even South Asia, the widespread lack of  
268 awareness is not unexpected. Our findings contrast with those of a Malaysian one, which  
269 indicated that almost 95% of respondents were aware of dengue fever, another viral illness,  
270 during its epidemic, despite their lack of understanding of transmission and management  
271 (24). A pilot study in Karachi, Pakistan, was conducted among people that visited hospitals.  
272 The findings indicated that 90% of the participants were aware of the viral disease, among  
273 whom only 38.5% possessed adequate knowledge (25). Similarly, another survey from  
274 Pakistan indicated that only 35% of the adults from low and high socioeconomic groups  
275 possessed sufficient knowledge of dengue during the outbreak (26). Further investigation into  
276 this is needed for public health since it is crucial to comprehend why the endemic population  
277 throughout the globe is so clueless about a newly developing virus (27).

278 The news of potential Human Monkeypox virus cases in Bangladesh spread like wildfire on  
279 social media in the middle of this worldwide upheaval. On the other hand, the Bangabandhu  
280 Sheikh Mujib Medical University (BSMMU) refuted these assertions, stating that no case of  
281 monkeypox had yet been identified (28). Given the continual discovery of the virus and the  
282 reported deaths, there is an urgent need to understand the source better, the dynamics of  
283 transmission, and to give people the knowledge and assistance they require to safeguard  
284 themselves and others in various situations (29). To the best of our knowledge, this is the first  
285 nationwide survey in Bangladesh to look into the general public's awareness and  
286 understanding of the fundamentals, spread, transmission, symptoms, prevention, and  
287 treatment of Human Monkeypox virus infection.

288 Additionally, most research participants were generally ignorant of the virus's origins.  
289 Moreover, the degree of understanding regarding the transmission channels is also generally  
290 inadequate. The World Health Organization (WHO) study indicated that one of the  
291 difficulties in avoiding the re-emergence of monkeypox was a lack of information about  
292 monkeypox, which is supported by our findings (30). Although the majority of participants in



293 the survey could not identify that monkeypox and smallpox have comparable symptoms,  
294 almost all of the individuals identified that monkeypox is a viral illness that affects them.  
295 Nevertheless, owing to a lack of information, the general population of Bangladesh is mostly  
296 in the dark about the identity and diversity of viruses prevalent worldwide.

297 We also demonstrated that those who use the internet or social media as a source of  
298 information are more knowledgeable than their peers about monkeypox. This might be  
299 because social media and the internet make it simple for most individuals to access  
300 information that has been updated. This emphasizes the usefulness of the internet for health  
301 promotion, especially in the case of pandemics (31). Compared to other resources, online  
302 media have emerged as one of the primary and expedient sources for information access (32).  
303 These findings are similar to other studies performed in Egypt (33) and Ethiopia (34) that  
304 mentioned the internet and social media as the main information sources. Newspapers, local  
305 leaders, and healthcare professionals appear to be a less common source of knowledge  
306 regarding the ailment when compared to other media. As a result, the Bangladeshi health  
307 system may increase the involvement of community leaders and health extension workers to  
308 disseminate information to the populace efficiently.

309 In line with the majority of previous research done in developing countries (35,36), we  
310 observed that men had a higher awareness of this viral illness than females in our study.  
311 Consistent with previous research (36–38), we found that as participants' levels of education  
312 grew, so did their awareness of the spread of this virus. Furthermore, the knowledge of  
313 people from the urban area was 1.4% higher than that of their rural counterparts. One Chinese  
314 study's outcome (39) is consistent with this observation. The greater availability of mass  
315 media might explain this in urban areas, such as television, radio, and online social networks  
316 (40). The general public's level of knowledge in this field may also be influenced by the  
317 availability of suitable facilities to support health educators, including medical personnel and  
318 government officials.

319 Given that Bangladesh is a multi-ethnic nation with widely varying economic conditions,  
320 levels of education, and cultural practices, it is anticipated that the population's levels of  
321 knowledge would likewise vary significantly. When standard and uniform education and  
322 dissemination initiatives are espoused and applied, population sectors without internet access  
323 or who reside in areas where the fast escalation of transmission is less likely will also show

324 reduced knowledge. This is true even though good KAP was present in a sizeable portion of  
325 the sample.

326 The findings of this study may have several implications for public health policymaking and  
327 practice. First, the lack of accurate knowledge of monkeypox in the Bangladeshi population  
328 amidst a global public health crisis requires multipronged interventions that promote  
329 education and preventive health behavior. Community-based, social media and mass media  
330 interventions have been effective in health promotion among the Bangladeshi population in  
331 the past, which informs the potential of these media to promote Human Monkeypox virus  
332 knowledge and prevention (41,42). Second, healthcare providers and social workers need to  
333 work with multisectoral organizations to mobilize organizational resources that ensure  
334 optimal preparedness for potential Human Monkeypox virus outbreaks and associated health  
335 hazards in Bangladesh. Third, community stakeholders should be engaged in participatory  
336 community prevention of monkeypox and other infections that may affect individuals and  
337 families living in diverse Bangladeshi communities. In this process, exploring and utilizing  
338 context-specific knowledge would be critical for successful infection prevention. Fourth,  
339 situational analyses at the community, Upazila, district, and divisional level should be  
340 conducted in the context of monkeypox and how a potential outbreak may impact the current  
341 state of healthcare and social services. These insights, alongside other data sources, should be  
342 used to create a national-level data dashboard that informs real-time decision-making for the  
343 prevention of Human Monkeypox virus outbreaks and other infection outbreaks. News  
344 agencies and other public media can use such a database to generate public knowledge and  
345 disseminate the same. Lastly, policy-level efforts should be made proactively to mitigate the  
346 potential crises that may arise from an outbreak and lessons learned from COVID-19, and  
347 Human Monkeypox virus outbreaks in similar contexts should be analyzed to inform national  
348 and local actions preventing adverse health outcomes in the future.

## 349 **5. Conclusion**

350 This study suggested that the general people of Bangladesh lack sufficient knowledge about  
351 the source of infection and the dynamics of monkeypox transmission. Enhanced  
352 comprehension may slow down the pace of disease transmission or the end of an emerging  
353 outbreak. Therefore, considering the ongoing virus emergence, it is vital to offer the  
354 necessary knowledge and support to help people protect themselves and others. In light of the  
355 current global public health crisis, healthcare professionals, public health workers, and

356 healthcare policymakers should collaborate to establish a robust disease surveillance system,  
357 and implement appropriate policies and interventions that enable effective health education  
358 and preventive health behaviors to promote public awareness, increase the precautionary  
359 behaviors and mitigate the potential crisis.

## 360 **6.Strengths and Limitations**

361 The strength of the present study stems from the fact that it was one of the earliest analyses  
362 regarding the knowledge of the general people of Bangladesh on the global Human  
363 Monkeypox virus epidemic. As it is a preliminary study, we have been unable to reach out to  
364 all the areas in Bangladesh within a short span. Moreover, due to limited logistic support, the  
365 sample size was smaller compared to a nationwide study. In future research regarding  
366 monkeypox, more precise data collection might be followed.

## 367 **Acknowledgements**

368 N/A

## 369 **Author Contribution:**

370 **Sudipta Deb Nath:** Conceptualization, Data analysis

371 **A.M.Khairul Islam:** Data analysis, Writing- Original draft preparation

372 **Koushik Majumder:** Data analysis, Investigation

373 **Fahmida Hoque Rimti:** Writing- Original draft preparation, Visualization

374 **Jyoti Das:** Writing- Reviewing and Editing, Data curation

375 **Mustari Nailah Tabassum:** Writing- Reviewing and Editing

376 **Arefin Naher Oishee:** Methodology, Data curation

377 **Tarannum Mahmood:** Data curation, Writing- Original draft preparation

378 **Monisha Paul:** Data curation, Data analysis

379 **Muntasrina Akhter:** Methodology, Visualization

380 **Alok Bijoy Bhadra:** Conceptualization, Validation

381 **Fariha Hoque Rimu:** Data curation, Writing- Reviewing and Editing

382 **Snahasish Chakraborty:** Data curation, Investigation

383 **Preetom Shom:** Data curation, Visualization

384 **Sirajum Monira Nosaibah:** Methodology, Data curation

385 **Md Ashikur Rahman:** Data curation, Investigation

386 **Ahmed Safwan khan:** Conceptualization, Data curation

387 **Anika Anjum:** Data curation, Visualization  
388 **Sushmita khan:** Data curation, Investigation  
389 **M. Mahbub Hossain:** Methodology, Writing- Reviewing and Editing  
390 **Mohammad Delwer Hossain Hawlader:** Supervision

391

392

## 393 **7. References:**

- 394 1. Damon IK. Status of human monkeypox: clinical disease, epidemiology and research.  
395 Vaccine. 2011 Dec 30;29(SUPPL. 4):D54–9.
- 396 2. Parker S, Nuara A, Buller RML, Schultz DA. Human monkeypox: an emerging  
397 zoonotic disease. <http://dx.doi.org/102217/174609132117> [Internet]. 2007 Feb 1 [cited  
398 2022 Aug 8];2(1):17–34. Available from:  
399 <https://www.futuremedicine.com/doi/10.2217/17460913.2.1.17>
- 400 3. Yinka-Ogunleye A, Aruna O, Dalhat M, Ogoina D, McCollum A, Disu Y, et al.  
401 Outbreak of human monkeypox in Nigeria in 2017–18: a clinical and epidemiological  
402 report. *Lancet Infect Dis*. 2019 Aug 1;19(8):872–9.
- 403 4. Damon IK, Roth CE, Chowdhary V. Discovery of Monkeypox in Sudan.  
404 <https://doi.org/101056/NEJMc060792> [Internet]. 2006 Aug 31 [cited 2022 Aug  
405 8];355(9):962–3. Available from:  
406 <https://www.nejm.org/doi/full/10.1056/NEJMc060792>
- 407 5. Yong SEF, Ng OT, Ho ZJM, Mak TM, Marimuthu K, Vasoo S, et al. Imported  
408 Monkeypox, Singapore. *Emerg Infect Dis* [Internet]. 2020 Aug 1 [cited 2022 Aug  
409 8];26(8):1826. Available from: </pmc/articles/PMC7392406/>
- 410 6. Rao AK, Schulte J, Chen T-H, Hughes CM, Davidson W, Neff JM, et al. Monkeypox  
411 in a Traveler Returning from Nigeria — Dallas, Texas, July 2021. *Morb Mortal Wkly*  
412 *Rep* [Internet]. 2022 Apr 4 [cited 2022 Aug 8];71(14):509. Available from:  
413 </pmc/articles/PMC8989376/>
- 414 7. WHO Director-General declares monkeypox outbreak a public health emergency of  
415 international concern - PAHO/WHO | Pan American Health Organization [Internet].

- 416 [cited 2022 Aug 8]. Available from: [https://www.paho.org/en/news/23-7-2022-who-](https://www.paho.org/en/news/23-7-2022-who-director-general-declares-monkeypox-outbreak-public-health-emergency)  
417 [director-general-declares-monkeypox-outbreak-public-health-emergency](https://www.paho.org/en/news/23-7-2022-who-director-general-declares-monkeypox-outbreak-public-health-emergency)
- 418 8. Bragazzi NL, Kong JD, Mahroum N, Tsigalou C, Khamisy-Farah R, Converti M, et al.  
419 Epidemiological trends and clinical features of the ongoing monkeypox epidemic: A  
420 preliminary pooled data analysis and literature review. *J Med Virol* [Internet]. 2022  
421 [cited 2022 Aug 8]; Available from:  
422 <https://onlinelibrary.wiley.com/doi/full/10.1002/jmv.27931>
- 423 9. Mileto D, Riva A, Cutrera M, Moschese D, Mancon A, Meroni L, et al. New  
424 challenges in human monkeypox outside Africa: A review and case report from Italy.  
425 *Travel Med Infect Dis*. 2022 Sep 1;49:102386.
- 426 10. Miura F, van Ewijk CE, Backer JA, Xiridou M, Franz E, Op de Coul E, et al.  
427 Estimated incubation period for monkeypox cases confirmed in the Netherlands, May  
428 2022. *Eurosurveillance* [Internet]. 2022 Jun 16 [cited 2022 Aug 8];27(24):2200448.  
429 Available from: [https://www.eurosurveillance.org/content/10.2807/1560-](https://www.eurosurveillance.org/content/10.2807/1560-7917.ES.2022.27.24.2200448)  
430 [7917.ES.2022.27.24.2200448](https://www.eurosurveillance.org/content/10.2807/1560-7917.ES.2022.27.24.2200448)
- 431 11. Monkeypox virus: ecology and public health significance - PubMed [Internet]. [cited  
432 2022 Aug 8]. Available from: <https://pubmed.ncbi.nlm.nih.gov/2853010/>
- 433 12. Brown K, Leggat PA. Human Monkeypox: Current State of Knowledge and  
434 Implications for the Future. *Trop Med Infect Dis* 2016, Vol 1, Page 8 [Internet]. 2016  
435 Dec 20 [cited 2022 Aug 8];1(1):8. Available from: [https://www.mdpi.com/2414-](https://www.mdpi.com/2414-6366/1/1/8/htm)  
436 [6366/1/1/8/htm](https://www.mdpi.com/2414-6366/1/1/8/htm)
- 437 13. Reynolds MG, Damon IK. Outbreaks of human monkeypox after cessation of  
438 smallpox vaccination. *Trends Microbiol*. 2012 Feb 1;20(2):80–7.
- 439 14. Roess AA, Monroe BP, Kinzoni EA, Gallagher S, Ibata SR, Badinga N, et al.  
440 Assessing the Effectiveness of a Community Intervention for Monkeypox Prevention  
441 in the Congo Basin. *PLoS Negl Trop Dis* [Internet]. 2011 Oct [cited 2022 Aug  
442 8];5(10):e1356. Available from:  
443 <https://journals.plos.org/plosntds/article?id=10.1371/journal.pntd.0001356>
- 444 15. Ihekweazu C, Yinka-Ogunleye A, Lule S, Ibrahim A. Importance of epidemiological  
445 research of monkeypox: is incidence increasing?

- 446 <https://doi.org/10.1080/1478721020201735361> [Internet]. 2020 May 3 [cited 2022 Aug  
447 8];18(5):389–92. Available from:  
448 <https://www.tandfonline.com/doi/abs/10.1080/14787210.2020.1735361>
- 449 16. Monkeypox [Internet]. [cited 2022 Aug 14]. Available from:  
450 [https://www.who.int/news-room/fact-  
451 sheets/detail/monkeypox?gclid=CjwKCAjw9NeXBhAMEiwAbaY4li6IGRnkvqzXu0h  
452 ygnapvBTJt4leRNdyZoyq7PSnapHggCi2V-  
453 3SUhoCU5EQAvD\\_BwE&fbclid=IwAR1xWm1fK0eEMRU9vJIua0fFhvl5pS5Egm\\_  
454 u1EoKK9v4MKS171OkXK0uPhE](https://www.who.int/news-room/fact-sheets/detail/monkeypox?gclid=CjwKCAjw9NeXBhAMEiwAbaY4li6IGRnkvqzXu0hygnapvBTJt4leRNdyZoyq7PSnapHggCi2V-3SUhoCU5EQAvD_BwE&fbclid=IwAR1xWm1fK0eEMRU9vJIua0fFhvl5pS5Egm_u1EoKK9v4MKS171OkXK0uPhE)
- 455 17. Harapan H, Setiawan AM, Yufika A, Anwar S, Wahyuni S, Asrizal FW, et al.  
456 Knowledge of human monkeypox viral infection among general practitioners: a cross-  
457 sectional study in Indonesia. <https://doi.org/10.1080/2047772420201743037> [Internet].  
458 2020 Feb 17 [cited 2022 Aug 8];114(2):68–75. Available from:  
459 <https://www.tandfonline.com/doi/abs/10.1080/20477724.2020.1743037>
- 460 18. Harapan H, Setiawan AM, Yufika A, Anwar S, Wahyuni S, Asrizal FW, et al.  
461 Confidence in managing human monkeypox cases in Asia: A cross-sectional survey  
462 among general practitioners in Indonesia. *Acta Trop*. 2020 Jun 1;206:105450.
- 463 19. Alshahrani NZ, Algethami MR, Alari AM, Abdelaal A, Sah R, Rodriguez-Morales AJ.  
464 Knowledge and attitude regarding monkeypox virus among physicians in Saudi  
465 Arabia, a cross-sectional study. 2022 Aug 15 [cited 2022 Aug 16]; Available from:  
466 <https://www.researchsquare.com>
- 467 20. Riccò M, Ferraro P, Camisa V, Satta E, Zaniboni A, Ranzieri S, et al. When a  
468 Neglected Tropical Disease Goes Global: Knowledge, Attitudes and Practices of  
469 Italian Physicians towards Monkeypox, Preliminary Results. *Trop Med Infect Dis*  
470 [Internet]. 2022 Jul 14 [cited 2022 Aug 16];7(7):135. Available from:  
471 <http://www.ncbi.nlm.nih.gov/pubmed/35878146>
- 472 21. Rodriguez-Morales AJ, Alshahrani NZ, Alzahrani F, Alarifi AM, Algethami MR,  
473 Alhumam MN, et al. Assessment of Knowledge of Monkeypox Viral Infection among  
474 the General Population in Saudi Arabia. *Pathog* 2022, Vol 11, Page 904 [Internet].  
475 2022 Aug 11 [cited 2022 Aug 16];11(8):904. Available from:  
476 <https://www.mdpi.com/2076-0817/11/8/904/htm>

- 477 22. Heinisch O, Cochran, W. G.: Sampling Techniques, 2. Aufl. John Wiley and Sons,  
478 New York, London 1963. Preis s. Biom Z [Internet]. 1965 Jan 1 [cited 2022 Aug  
479 14];7(3):203–203. Available from:  
480 <https://onlinelibrary.wiley.com/doi/full/10.1002/bimj.19650070312>
- 481 23. 2022 U.S. Monkeypox Outbreak | Monkeypox | Poxvirus | CDC [Internet]. [cited 2022  
482 Aug 14]. Available from:  
483 <https://www.cdc.gov/poxvirus/monkeypox/response/2022/index.html>
- 484 24. Naing C, Ren WY, Man CY, Fern KP, Qiqi C, Ning CN, et al. Awareness of Dengue  
485 and Practice of Dengue Control Among the Semi-Urban Community: A Cross  
486 Sectional Survey. J Community Heal 2011 366 [Internet]. 2011 Apr 29 [cited 2022  
487 Aug 8];36(6):1044–9. Available from:  
488 <https://link.springer.com/article/10.1007/s10900-011-9407-1>
- 489 25. Itrat A, Khan A, Javaid S, Kamal M, Khan H, Javed S, et al. Knowledge, Awareness  
490 and Practices Regarding Dengue Fever among the Adult Population of Dengue Hit  
491 Cosmopolitan. PLoS One [Internet]. 2008 Jul 9 [cited 2022 Aug 8];3(7):e2620.  
492 Available from:  
493 <https://journals.plos.org/plosone/article?id=10.1371/journal.pone.0002620>
- 494 26. Syed M, Saleem T, Syeda U-R, Habib M, Zahid R, Bashir A, et al. Knowledge,  
495 attitudes and practices regarding dengue fever among adults of high and low  
496 socioeconomic groups. J Pak Med Assoc [Internet]. 2010 Mar 1 [cited 2022 Aug  
497 8];60(3). Available from: [https://ecommons.aku.edu/pakistan\\_fhs\\_mc\\_chs\\_chs/14](https://ecommons.aku.edu/pakistan_fhs_mc_chs_chs/14)
- 498 27. Cheema S, Maisonneuve P, Weber I, Fernandez-Luque L, Abraham A, Alrouh H, et al.  
499 Knowledge and perceptions about Zika virus in a Middle East country. BMC Infect  
500 Dis [Internet]. 2017 Jul 26 [cited 2022 Aug 8];17(1):1–9. Available from:  
501 <https://link.springer.com/articles/10.1186/s12879-017-2603-6>
- 502 28. No monkeypox case detected in Bangladesh yet, BSMMU says | Daily Star [Internet].  
503 [cited 2022 Aug 8]. Available from:  
504 [https://www.thedailystar.net/health/disease/news/no-Monkeypox-case-detected-](https://www.thedailystar.net/health/disease/news/no-Monkeypox-case-detected-bangladesh-yet-bsmmu-says-3030726)  
505 [bangladesh-yet-bsmmu-says-3030726](https://www.thedailystar.net/health/disease/news/no-Monkeypox-case-detected-bangladesh-yet-bsmmu-says-3030726)
- 506 29. Multi-country monkeypox outbreak: situation update [Internet]. [cited 2022 Aug 8].  
507 Available from: <https://www.who.int/emergencies/disease-outbreak-news/item/2022->

508 DON392

509 30. Switzerland G., WHO Advisory Committee on Variola Virus Research Report of the  
510 Nineteenth Meeting. 2017;

511 31. Budd J, Miller BS, Manning EM, Lampos V, Zhuang M, Edelstein M, et al. Digital  
512 technologies in the public-health response to COVID-19. *Nat Med* 2020 268 [Internet].  
513 2020 Aug 7 [cited 2022 Aug 8];26(8):1183–92. Available from:  
514 <https://www.nature.com/articles/s41591-020-1011-4>

515 32. Mohamed Ahmed Ayed M, Abd Elaziem Mohamed A, Mohamed Mahmoud T,  
516 Mohammed AbdElaziz S. Effect of Educational Intervention on Secondary School  
517 Students' Knowledge, Practices and Attitudes Regarding COVID-19. *Egypt J Heal*  
518 *Care* [Internet]. 2021 Jun 1 [cited 2022 Aug 8];12(2):58–74. Available from:  
519 [https://ejhc.journals.ekb.eg/article\\_145405.html](https://ejhc.journals.ekb.eg/article_145405.html)

520 33. Souli D, Dilucca M. Knowledge, attitude and practice of secondary school students  
521 toward COVID-19 epidemic in Italy: a cross sectional study. *bioRxiv* [Internet].  
522 2020 May 9 [cited 2022 Aug 8];2020.05.08.084236. Available from:  
523 <https://www.biorxiv.org/content/10.1101/2020.05.08.084236v1>

524 34. Aynalem YA, Akalu TY, Gebregiorgis BG, Sharew NT, Assefa HK, Shiferaw WS.  
525 Assessment of undergraduate student knowledge, attitude, and practices towards  
526 COVID-19 in Debre Berhan University, Ethiopia. *PLoS One* [Internet]. 2021 May 1  
527 [cited 2022 Aug 8];16(5):e0250444. Available from:  
528 <https://journals.plos.org/plosone/article?id=10.1371/journal.pone.0250444>

529 35. Islam FMA, Chakrabarti R, Dirani M, Islam MT, Ormsby G, Wahab M, et al.  
530 Knowledge, Attitudes and Practice of Diabetes in Rural Bangladesh: The Bangladesh  
531 Population Based Diabetes and Eye Study (BPDES). *PLoS One* [Internet]. 2014 Oct  
532 14 [cited 2022 Aug 8];9(10):e110368. Available from:  
533 <https://journals.plos.org/plosone/article?id=10.1371/journal.pone.0110368>

534 36. Shah V, Kamdar P, Shah N. Assessing the knowledge, attitudes and practice of type 2  
535 diabetes among patients of Saurashtra region, Gujarat. *Int J Diabetes Dev Ctries*  
536 [Internet]. 2009 [cited 2022 Aug 8];29(3):118. Available from:  
537 </pmc/articles/PMC2822215/>



- 538 37. Rani P, Raman R, Subramani S, Perumal G, Kumaramanickavel G, Sharma T.  
539 Knowledge of diabetes and diabetic retinopathy among rural populations in India, and  
540 the influence of knowledge of diabetic retinopathy on attitude and practice. [cited 2022  
541 Aug 8]; Available from: <http://www.rrh.org.au><http://www.rrh.org.au>
- 542 38. Deepa M, Bhansali A, Anjana R, Pradeepa R, Joshi S, Joshi P, et al. Knowledge and  
543 awareness of diabetes in urban and rural India: The Indian Council of Medical  
544 Research India Diabetes Study (Phase I): Indian Council of Medical Research India  
545 Diabetes 4. *Indian J Endocrinol Metab* [Internet]. 2014 May 1 [cited 2022 Aug  
546 8];18(3):379. Available from: [/pmc/articles/PMC4056139/](https://pubmed.ncbi.nlm.nih.gov/24811399/)
- 547 39. Wen F, Meng Y, Cao H, Xia J, Li H, Qi H, et al. Knowledge, attitudes, practices of  
548 primary and middle school students at the outbreak of COVID-19 in Beijing: A cross-  
549 sectional online study. *medRxiv* [Internet]. 2020 Jun 30 [cited 2022 Aug  
550 8];2020.06.29.20138628. Available from:  
551 <https://www.medrxiv.org/content/10.1101/2020.06.29.20138628v1>
- 552 40. Al Ahdab S. Knowledge, Attitudes and Practices (KAP) towards pandemic COVID-19  
553 among Syrians. 2020 [cited 2022 Aug 8]; Available from:  
554 <https://doi.org/10.21203/rs.3.rs-27859/v2>
- 555 41. Rahman M, Obaida-Nasrin S. Factors affecting acceptance of complete immunization  
556 coverage of children under five years in rural Bangladesh.
- 557 42. Rabbi AMF. Mass Media Exposure and its Impact on Fertility: Current Scenario of  
558 Bangladesh. *J Sci Res* [Internet]. 2012 Apr 23 [cited 2022 Aug 8];4(2):383–383.  
559 Available from: <https://www.banglajol.info/index.php/JSR/article/view/8917>
- 560
- 561
